# Supplementary material for: Polyunsaturated fatty acids inhibit a pentameric ligand-gated ion channel through one of two binding sites
Source: eLife. 2022 Jan 4;11:e74306. doi: 10.7554/eLife.74306 (PMC8786314; doi:10.7554/eLife.74306)
Supplement: Figure 4—source data 1. [file elife-74306-fig4-data1.xlsx]

## Sheet: Sheet1
MS data for Figure 4A and 4B
M3 peptide + KK-242						M4 peptide + KK-242
Ion	Experimental	Theoretical	z	mass accuracy (ppm)		Ion	Experimental	Theoretical	z	mass accuracy (ppm)
b3	374.208	374.207	1	1.33616		b3	332.197	332.197	1	0.903079
b4	475.255	475.255	1	0.210413		b4	429.25	429.25	1	1.16482
b5	576.303	576.303	1	0.867599		b5	542.33	542.334	1	7.37553
b6	675.372	675.371	1	1.03647		b6	599.356	599.355	1	1.00108
b7	788.456	788.455	1	0.887812		b7	746.424	746.424	1	0.937805
b8	903.483	903.482	1	0.885463		b8	859.509	859.508	1	1.2798
b9	1031.54	1031.54	1	1.06637		b9	930.545	930.545	1	0.752248
b9*	1361.69	1361.68	1	3.52504		b10	1043.63	1043.63	1	3.4495
b10	1162.58	1162.58	1	1.1182		b11	1100.65	1100.65	1	1.81711
b10*	1492.73	1492.73	1	4.01949		b12	1203.66	1203.66	1	1.2462
b11	1275.67	1275.67	1	1.6462		y2	233.15	233.15	1	0.857818
b11*	1605.81	1605.81	1	3.11369		y5	559.357	559.356	1	0.893885
y2	312.178	312.178	1	0.32033		y5*	889.502	889.5	1	2.36088
y3	449.237	449.237	1	0.4452		y6	672.441	672.44	1	1.04098
y4	520.274	520.274	1	0.384413		y6*	1002.59	1002.58	1	1.8951
y5	667.343	667.342	1	0.899089		y7	771.51	771.509	1	1.16655
y6	780.427	780.426	1	0.76881		y7*	1101.65	1101.65	1	1.45236
y7	893.511	893.51	1	1.11918		y8	884.594	884.593	1	1.13046
y8	1006.6	1006.59	1	0.794759		y8*	1214.74	1214.74	1	2.05806
y9	1119.68	1119.68	1	1.16105		y9	983.662	983.661	1	1.01661
y10	1232.76	1232.76	1	1.37902		y10*	1416.82	1416.81	1	3.03498
y11	1303.8	1303.8	1	1.45728		y11	1143.69	1143.69	1	0.437181
y12	1374.84	1374.84	1	1.09104		y11*	1473.84	1473.84	1	1.8998
y13	1521.91	1521.91	1	1.51126		y12	1256.78	1256.78	1	3.02361
y14	1634.99	1634.99	1	2.26301		y12*	1586.92	1586.92	1	1.70141
y15	1722.02	1722.02	1	1.04528		y13*	1657.96	1657.96	1	1.26662
y16	1779.05	1779.04	1	3.20397
* indicates b and y fragment ions containing the KK-242 mass
