# Supplementary material for: Polyunsaturated fatty acids inhibit a pentameric ligand-gated ion channel through one of two binding sites
Source: eLife. 2022 Jan 4;11:e74306. doi: 10.7554/eLife.74306 (PMC8786314; doi:10.7554/eLife.74306)
Supplement: Figure 4—source data 2. [file elife-74306-fig4-data2.xlsx]

## Sheet: Sheet1
Shown are MS intensities for unlabeled and labeled peptides of M4
		Replicate 1
		30 mM cysteamine					No cysteamine
		DHA (uM)			PA (uM)		DHA (uM)
XIC m/z range	M4 peptide	0	10	30	10	30	0	10	30
729.44-729.46	Unlabeled	7.69822e+06	1.01057e+07	8.74415e+06	8.21682e+06	8.6149e+06	6.58534e+06	7.49935e+06	8.47155e+06
736.76-736.78	Unlabeled	2.06887e+06	2.76274e+06	2.2573e+06	2.28306e+06	2.33115e+06	2.0548e+06	2.2416e+06	2.22561e+06
737.09-737.11	Unlabeled	2.65782e+06	3.52042e+06	2.91196e+06	2.85983e+06	2.92294e+06	2.6816e+06	2.87925e+06	2.91064e+06
737.42-737.44	Unlabeled	1.81211e+06	2.40419e+06	1.99429e+06	1.98308e+06	2.07796e+06	1.8793e+06	1.97949e+06	1.956e+06
Sum		1.4237e+07	1.87931e+07	1.59077e+07	1.53428e+07	1.59469e+07	1.3201e+07	1.45997e+07	1.55638e+07
839.48-839.5	Labeled	114739	70069.1	15497.9	112986	108971	55562.9	68283	83668.9
839.81-839.83	Labeled	141166	141226	28806.1	168950	96958.8	74800.3	84591.1	115034
840.15-840.17	Labeled	89757	97192.7	23113.4	122438	86759.9	47192.3	62140.2	50965.3
Sum		345662	308487	67417.3	404374	292690	177556	215014	249668
Efficiency		0.0237036	0.0161498	0.00422015	0.0256792	0.0180232	0.0132716	0.0145136	0.0157883
		Replicate 2
		30 mM cysteamine					No cysteamine
		DHA (uM)			PA (uM)		DHA (uM)
XIC m/z range	M4 peptide	0	10	30	10	30	0	10	30
729.44-729.46	Unlabeled	1.77207e+08	1.35039e+08	1.52499e+08	1.5158e+08	1.29999e+08	2.03407e+08	2.07667e+08	7.8665e+07
736.76-736.78	Unlabeled	3.30612e+07	2.60048e+07	2.84146e+07	2.45415e+07	2.39586e+07	4.5167e+07	3.80476e+07	1.2066e+07
737.09-737.11	Unlabeled	4.08897e+07	3.37774e+07	3.78896e+07	3.35633e+07	3.04971e+07	5.51845e+07	5.13709e+07	1.72065e+07
737.42-737.44	Unlabeled	2.72508e+07	2.18195e+07	2.35743e+07	2.26989e+07	1.9812e+07	3.91847e+07	3.38274e+07	9.74217e+06
Sum		2.78409e+08	2.16641e+08	2.42377e+08	2.32383e+08	2.04266e+08	3.42943e+08	3.30913e+08	117679699
839.48-839.5	Labeled	7.80751e+06	4.66868e+06	789101	5.22062e+06	5.87113e+06	1.37077e+07	1.14248e+07	1.35861e+07
839.81-839.83	Labeled	1.41372e+07	3.75829e+06	511618	9.4439e+06	9.32584e+06	1.97839e+07	2.07972e+07	1.91508e+07
840.15-840.17	Labeled	1.00479e+07	2.82099e+06	699006	7.62768e+06	6.98391e+06	1.47985e+07	1.456e+07	1.57178e+07
Sum		3.19927e+07	1.1248e+07	1.99972e+06	2.22922e+07	2.21809e+07	4.82901e+07	4.67821e+07	4.84547e+07
Efficiency		0.103069	0.0493573	0.00818294	0.0875317	0.0979516	0.12343	0.123862	0.29166
		Replicate 3
		30 mM cysteamine					No cysteamine
		DHA (uM)			PA (uM)		DHA (uM)
XIC m/z range	M4 peptide	0	10	30	10	30	0	10	30
729.44-729.46	Unlabeled	1.68142e+08	1.99271e+08	5.02037e+07	1.46607e+08	1.2566e+08	1.61303e+08	1.43537e+08	1.56778e+08
736.76-736.78	Unlabeled	3.31899e+07	4.27846e+07	1.54614e+06	2.96823e+07	1.03933e+07	3.34389e+07	3.05593e+07	1.35744e+07
737.09-737.11	Unlabeled	4.19957e+07	5.49946e+07	8.93385e+06	3.74787e+07	3.57121e+07	4.25586e+07	3.76932e+07	4.26717e+07
737.42-737.44	Unlabeled	2.65429e+07	3.78676e+07	5.44486e+06	2.64077e+07	2.46172e+07	2.8669e+07	2.54664e+07	2.8883e+07
Sum		2.69871e+08	3.34918e+08	6.61285e+07	2.40175e+08	1.96383e+08	2.65969e+08	2.37255e+08	2.41907e+08
839.48-839.5	Labeled	1.22288e+07	5.89567e+06	262527	6.50297e+06	6.66478e+06	6.32531e+06	8.22087e+06	6.3231e+06
839.81-839.83	Labeled	1.7093e+07	9.09905e+06	593727	1.0953e+07	1.04121e+07	1.11583e+07	1.28958e+07	8.21421e+06
840.15-840.17	Labeled	1.52617e+07	7.0046e+06	285344	8.15528e+06	7.50668e+06	8.59548e+06	9.66489e+06	6.51168e+06
Sum		4.45835e+07	2.19993e+07	1.1416e+06	2.56112e+07	2.45836e+07	2.60791e+07	3.07816e+07	2.1049e+07
Efficiency		0.141781	0.061637	0.0169704	0.0963601	0.111255	0.0892972	0.114841	0.0800476
